# Supplementary material
Source: MDPI journal article supplement (https://www.mdpi.com/2073-4441/9/9/659)
Supplement: s1 [file s1]

# Methane Emissions in Spanish Saline Lakes: Current Rates, Temperature and Salinity Responses, and Evolution under Different Climate Change Scenarios

Antonio Camacho , Antonio Picazo, Carlos Rochera, Anna C. Santamans, Daniel Morant, Javier Miralles-Lorenzo and Andreu Castillo-Escriva

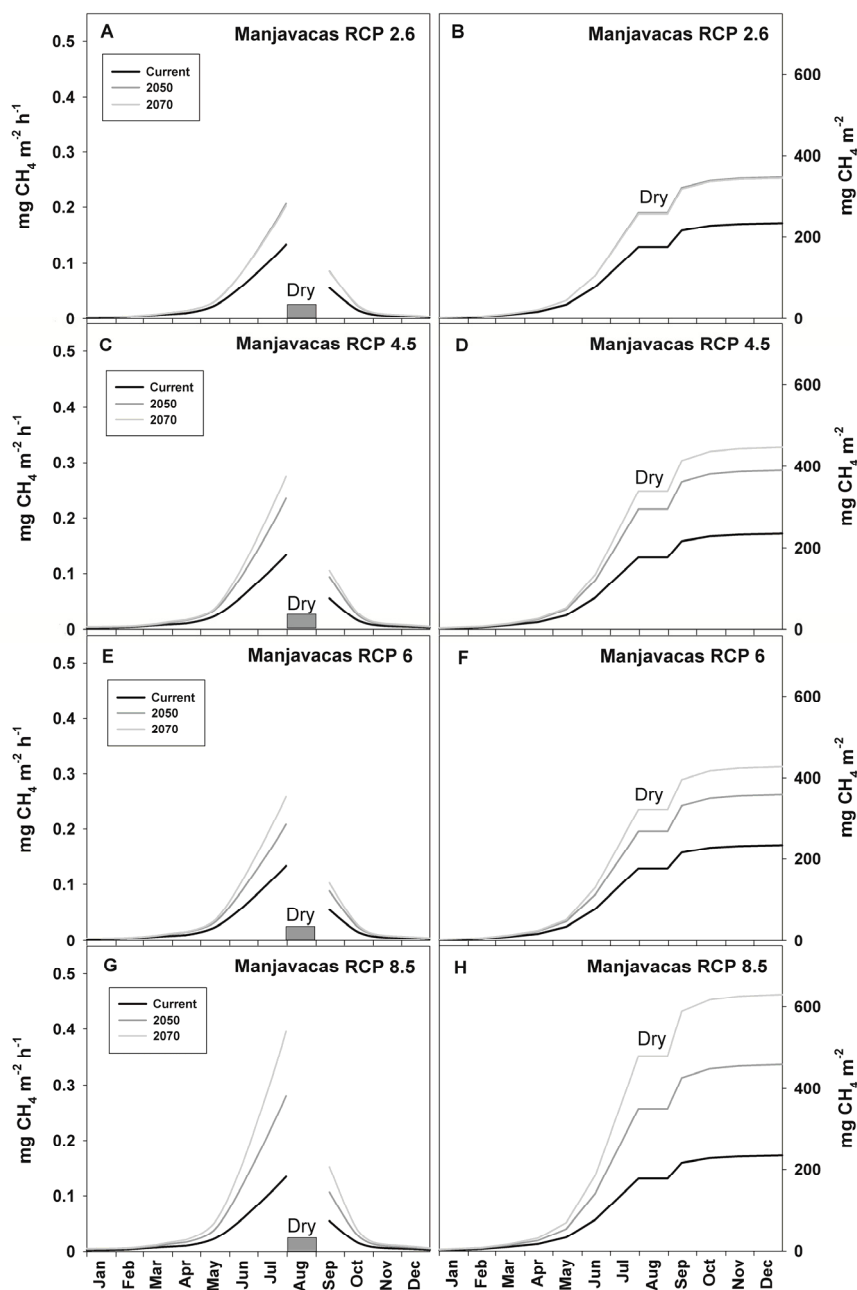

Figure S1: (left) Monthly variations of methane release; and (right) cumulative methane release during the year, predicted for Lake Alcahazo within the four RCP scenarios and 2050 and 2070 as temporal frame.

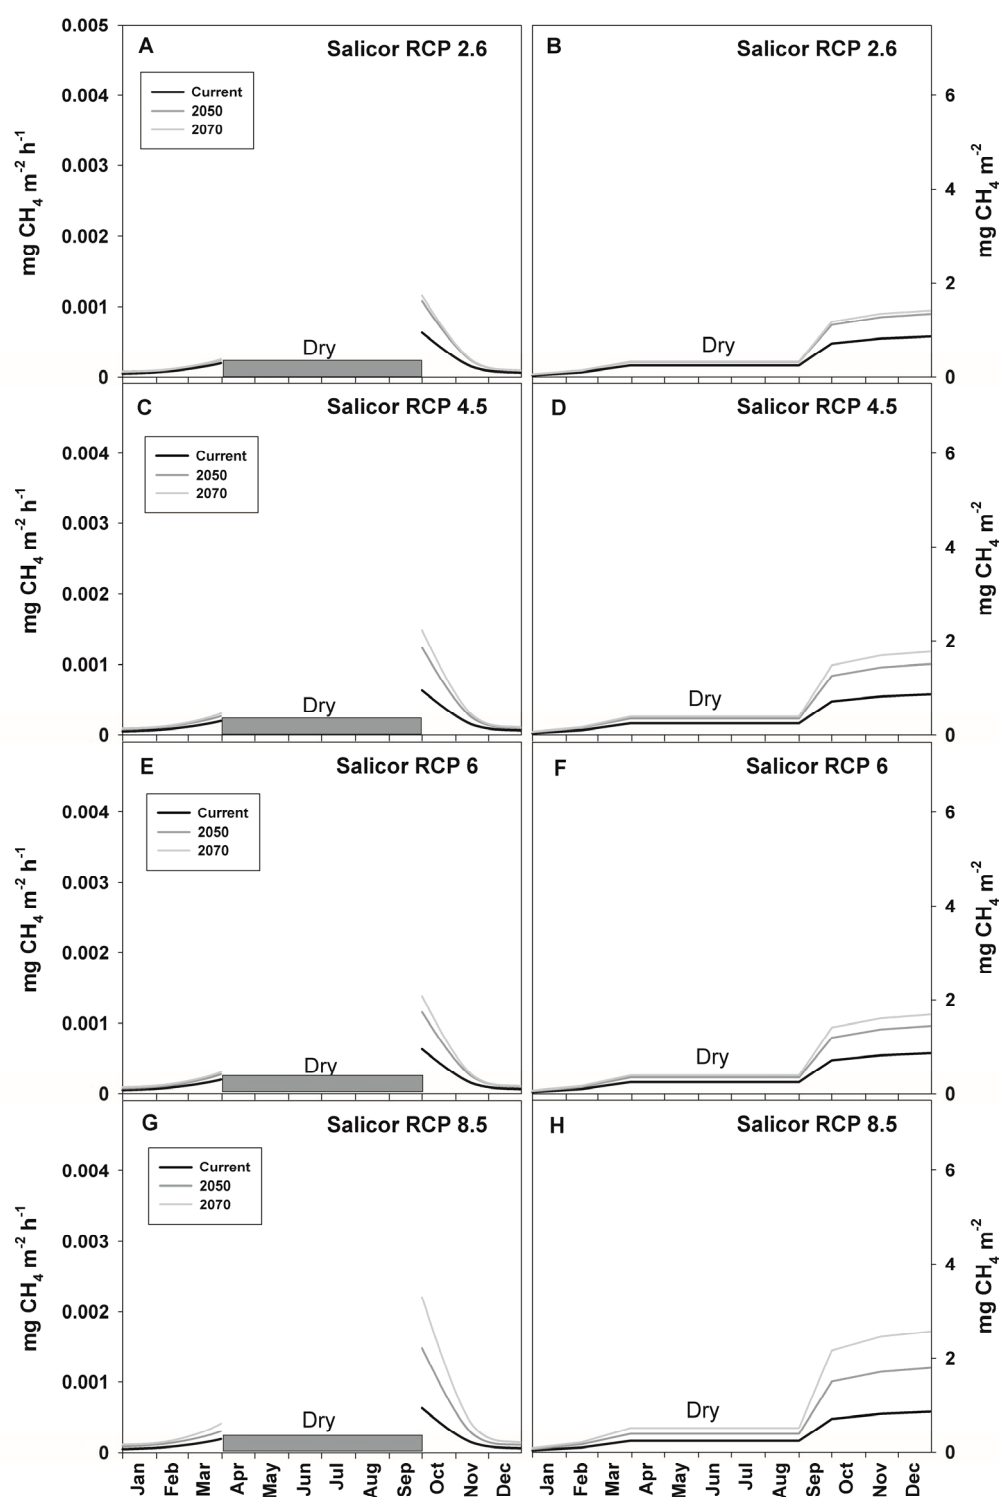

Figure S2: (left) Monthly variations of methane release; and (right) cumulative methane release during the year, predicted for Lake Tirez within the four RCP scenarios and 2050 and 2070 as temporal frame.

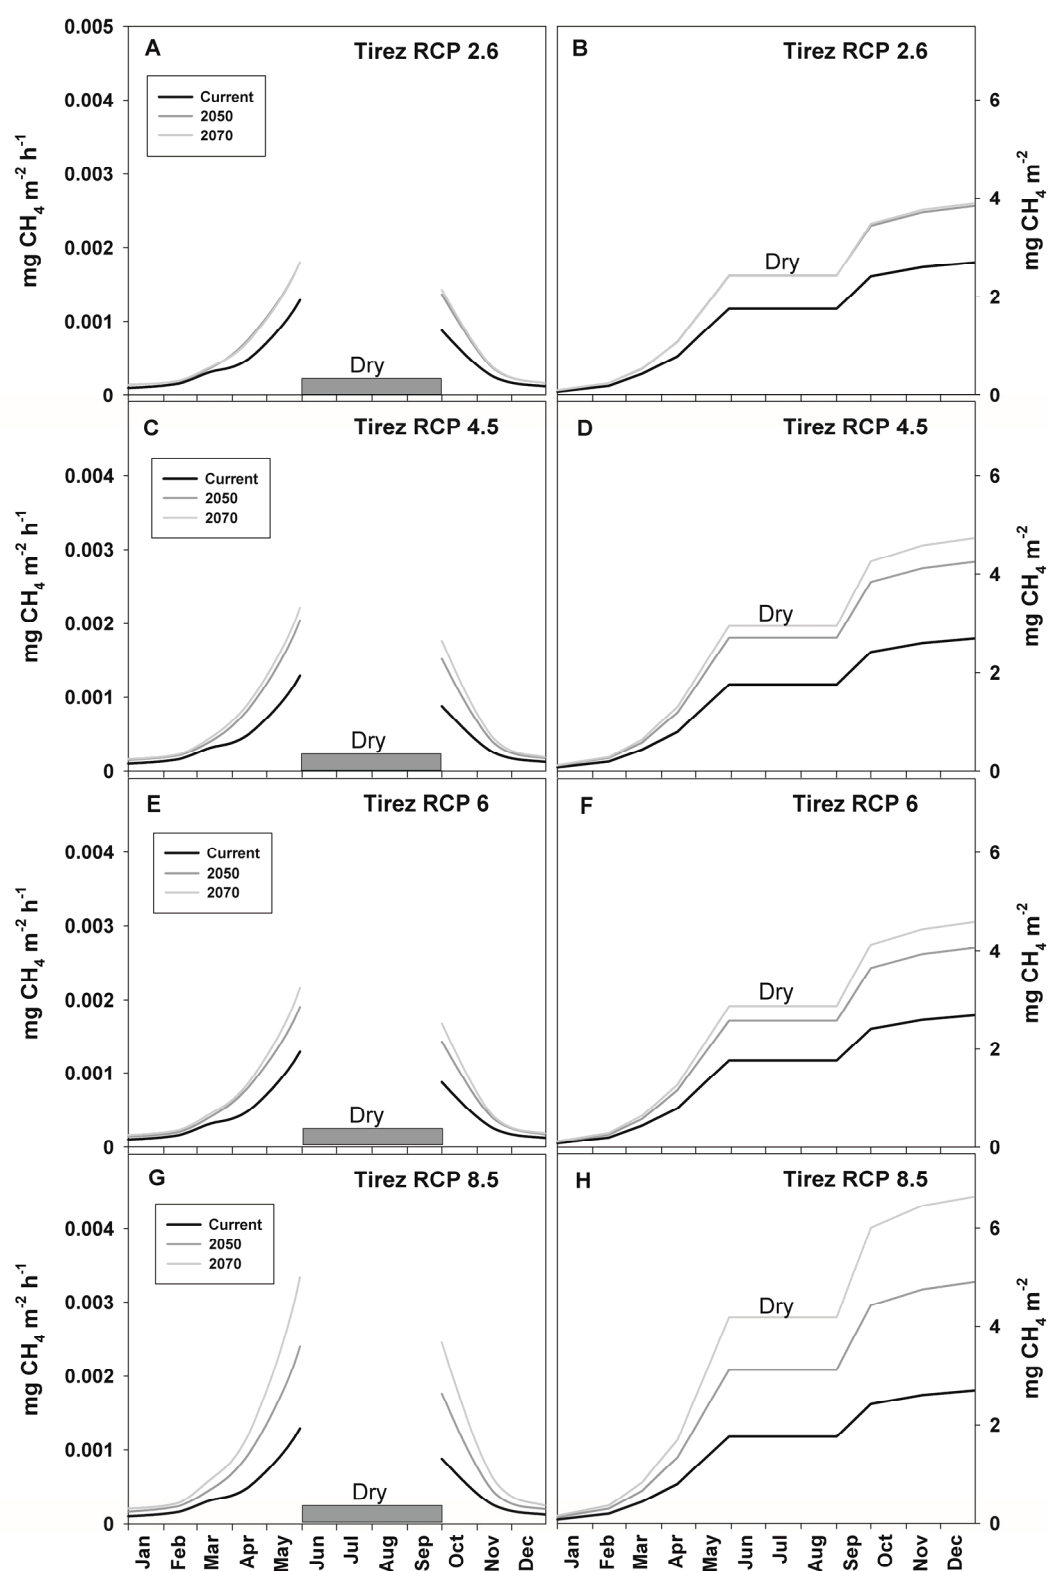

Figure S3: (left) Monthly variations of methane release; and (right) cumulative methane release during the year, predicted for Lake Salicor within the four RCP scenarios and 2050 and 2070 as temporal frame.

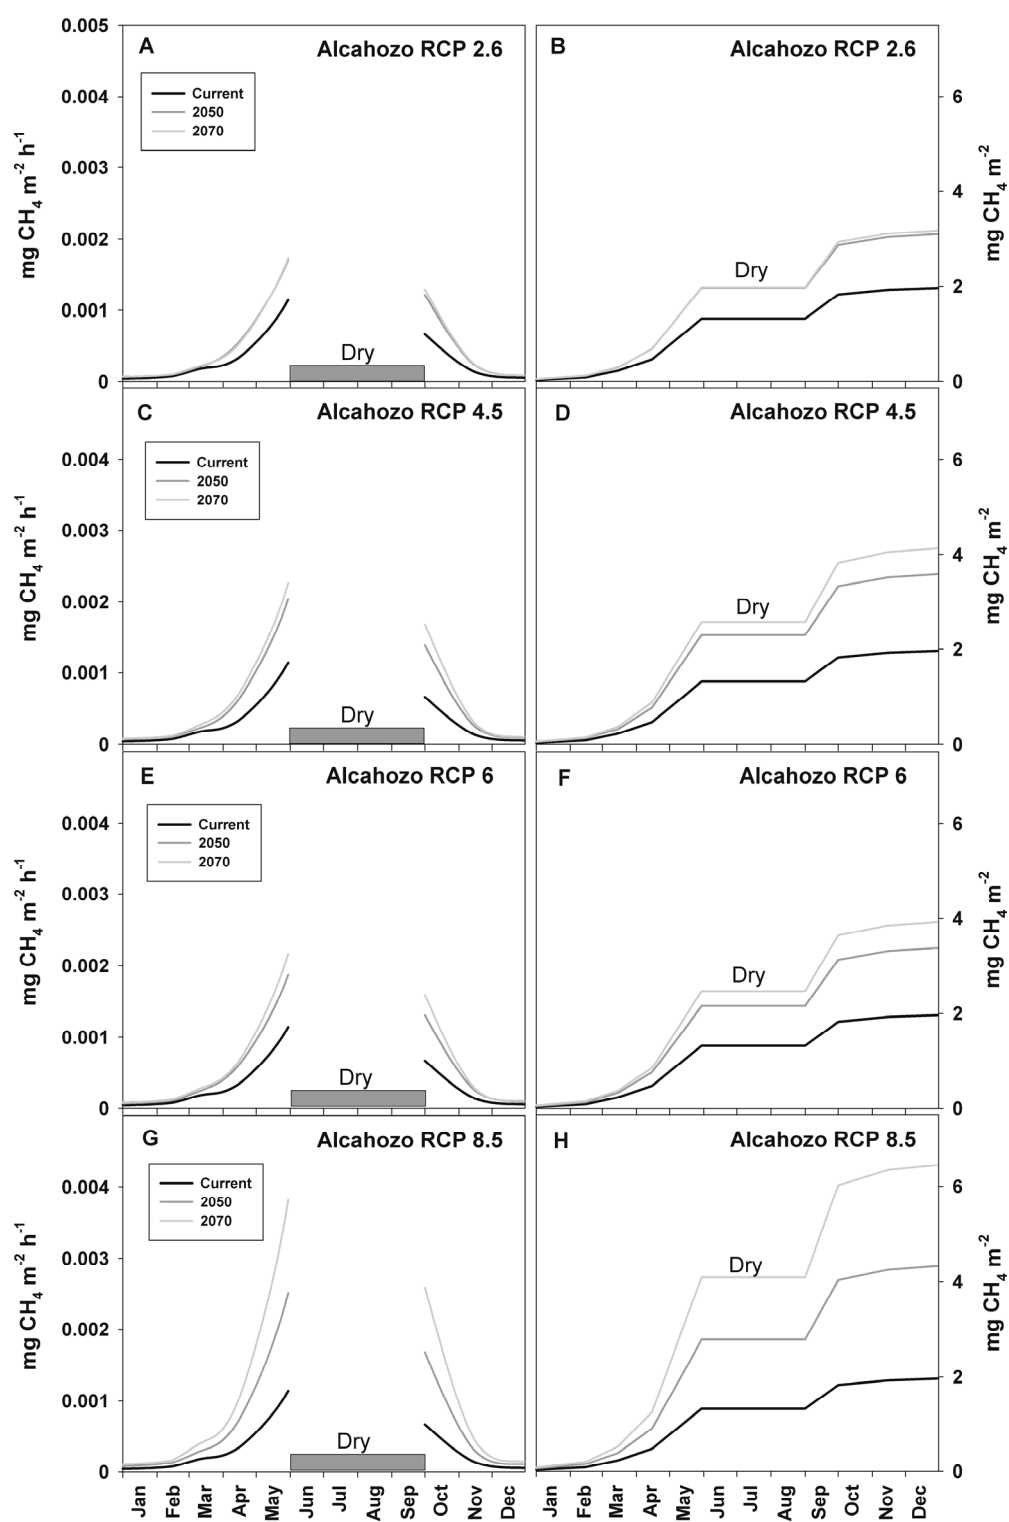

Figure S4: (left) Monthly variations of methane release; and (right) cumulative methane release during the year, predicted for Lake Manjavacas within the four RCP scenarios and 2050 and 2070 as temporal frame.

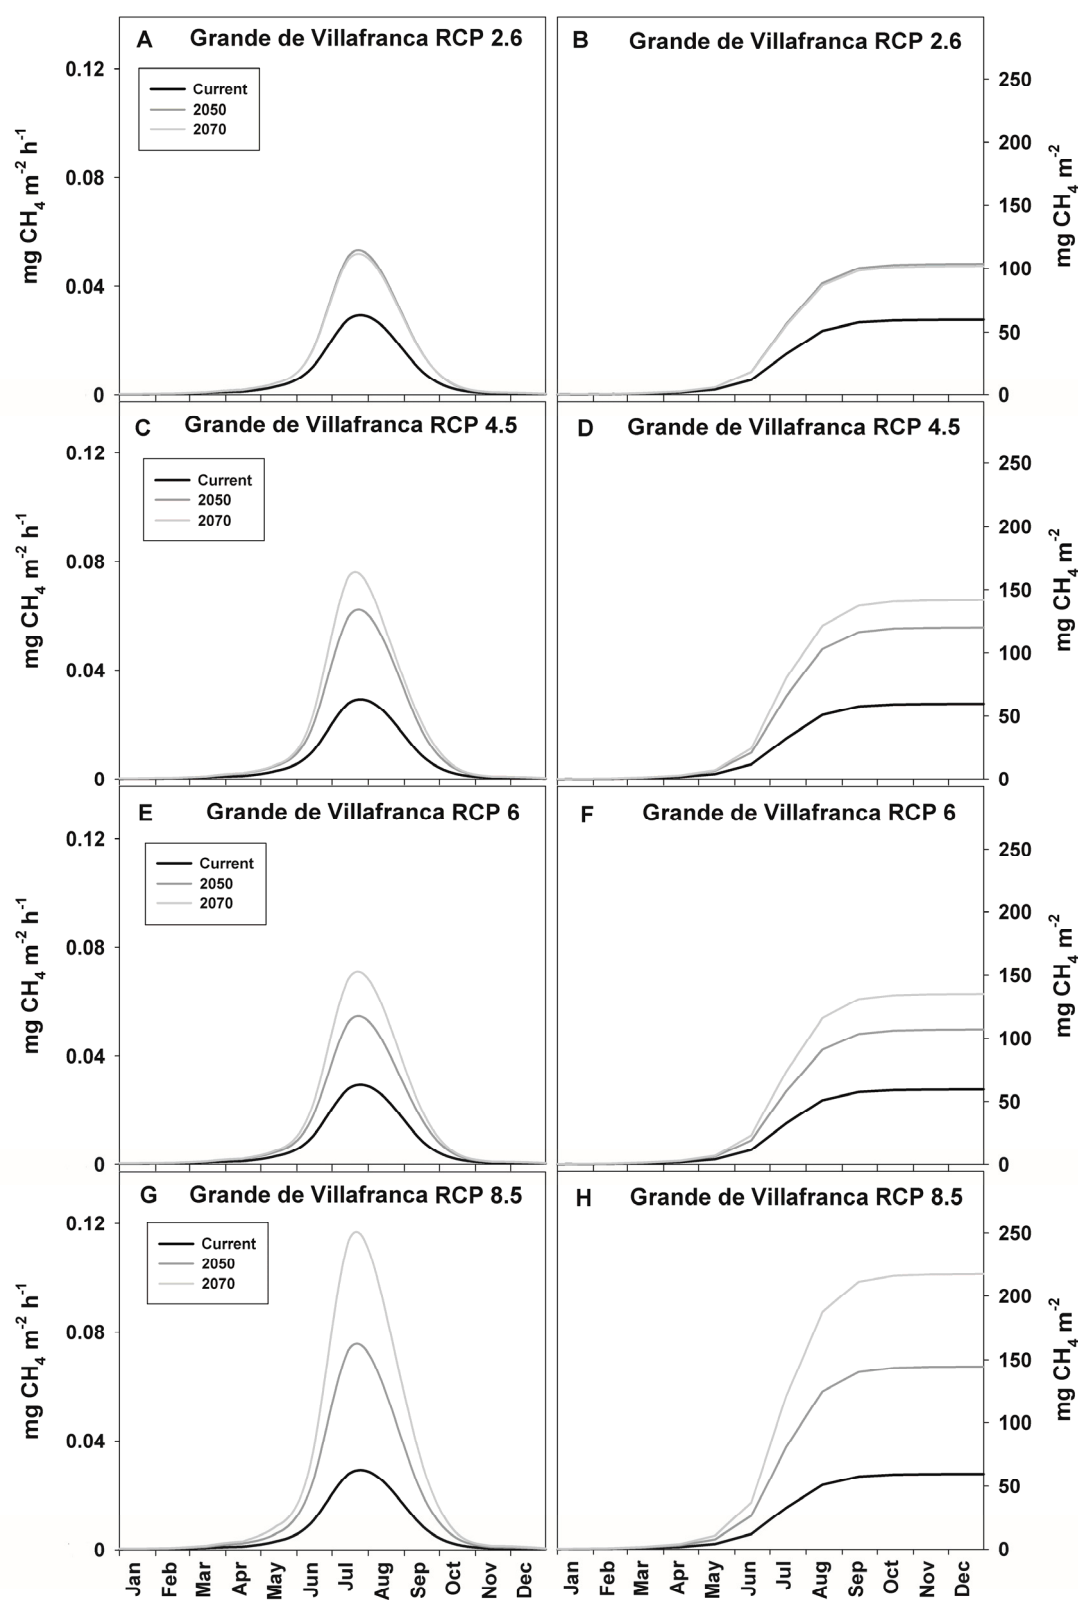

Figure S5: (left) Monthly variations of methane release; and (right) cumulative methane release during the year, predicted for Lake Grande de Villafranca within the four RCP scenarios and 2050 and 2070 as temporal frame.
